# Supplementary material
Source: PubMed Central journal article supplement (PMC4321879)
Supplement: NIHMS660128-supplement-Supplemental.pdf [file NIHMS660128-supplement-Supplemental.pdf]

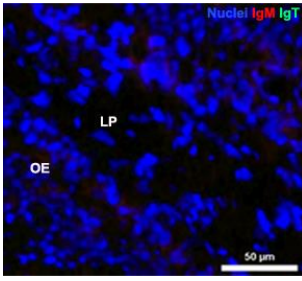

**Supplementary Figure 1: The lamina propria of the rainbow trout olfactory epithelium does not harbor IgT or IgM B cells.** Representative rainbow trout olfactory organ cryosection where the lamina propria (LP) is negatively stained with anti-trout IgM and anti-trout IgT antibodies. OE: olfactory epithelium.

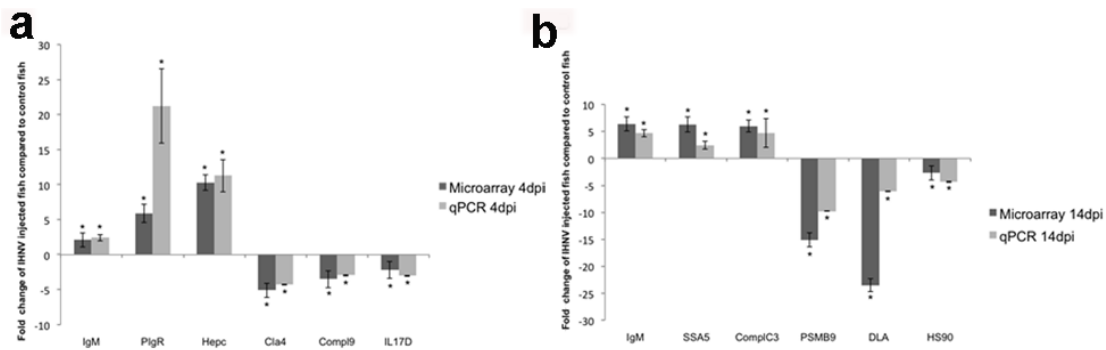

**Supplementary Figure 2: Confirmation of microarray studies by quantitative real-time polymerase chain reaction (qRT-PCR) of mRNAs of six selected genes in the olfactory organ of rainbow trout.** (a) 4 dpi (b) 14 dpi nasal vaccination with IHNV vaccine. Supplementary Bars represent mean  $\pm$  SEM (N=4) and asterisks indicate significant ( $p < 0.05$ ) differences. The genes chosen for the 4 dpi time point were: IgM, pIgR, Heparin-binding EGF-like motif containing protein 2 (Hepc), Claudin 4 (Cla4), Complement c9 (Compl9), IL-17D. The genes selected for the 14 dpi time point were: IgM, serum amyloid A 5 (SSA5), Complement C3 (complC3), PSMB9, DLA class I, Heat shock protein 90 (Hs90).

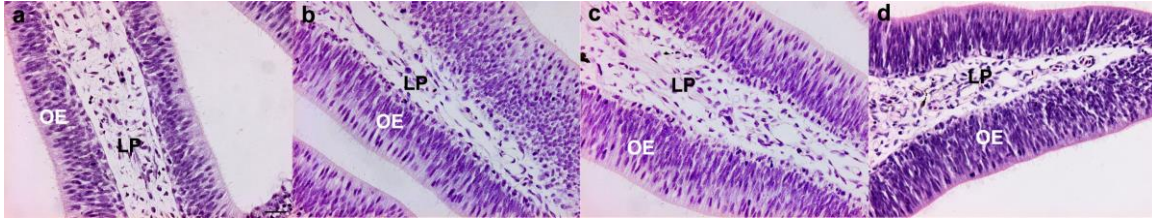

**Supplementary Figure 3:** Histological studies of i.m vaccinated trout olfactory organ. Trout that receive an i.m injection of live attenuated IHNV vaccine have similar olfactory organ to that of control fish. a) Control, b) i.m vaccinated 4 dpi c) i.m vaccinated 14 dpi d) i.m vaccinated 28 dpi. Results are representative of one experiment N=5. LP: lamina propria, OE: olfactory epithelium. Scale bar: 100  $\mu$ m.

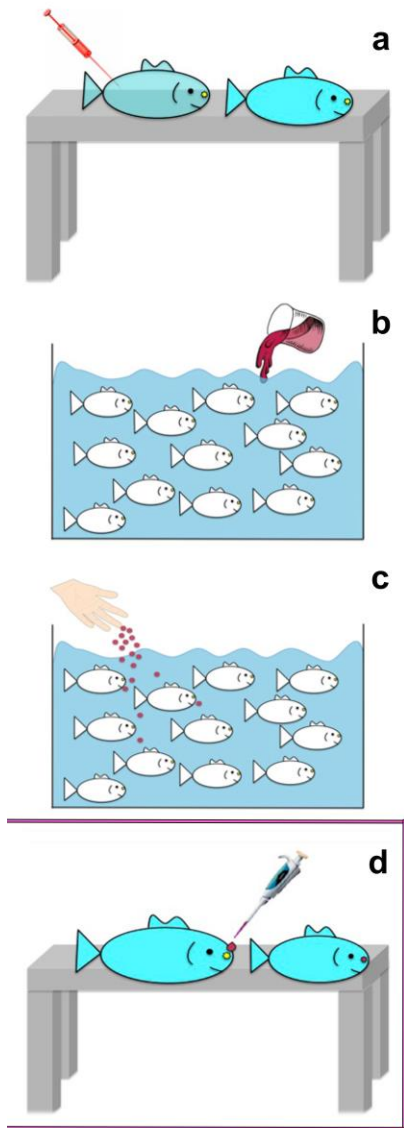

**Supplementary Figure 4: Cartoon of different fish vaccination methods.** Injection, immersion and oral delivery (a-c) methods have been used in fish farming over the past thirty years. Pink box indicates the new proposed nasal vaccination method (d).

Supplementary Table 1: Primers used in this study

| Gene          | Primer name | Primer Sequence (5'-3')      | Application |
|---------------|-------------|------------------------------|-------------|
| MX1           | MXF         | GATGCTGCACCTCAAGTCCTACTA     | qPCR        |
|               | MXR         | CGGATCACCATGGGAATCTGA        | qPCR        |
| IFN $\gamma$  | IFNgF       | GCTGTTCAACGGAAAACCTGTTT      | qPCR        |
|               | IFNgR       | TCACTGTCCTCAAACGTG           | qPCR        |
| IL2           | IL2F        | CATGTCCAGATTCAGTCTTCTATACACC | qPCR        |
|               | IL2R        | GAAGTGTCCGTTGTGCTGTTCTC      | qPCR        |
| TNF $\alpha$  | TNFaF       | GGGGACAAACTGTGGACTGA         | qPCR        |
|               | TNFaR       | GAAGTTCTTGCCCTGCTCTG         | qPCR        |
| IL6           | IL6F        | ACTCCCCTCTGTCACACACC         | qPCR        |
|               | IL6R        | GGCAGACAGGTCTCCACTA          | qPCR        |
| IL8           | IL8F        | AGAATGTCAGCCAGCCTTGT         | qPCR        |
|               | IL8R        | TCTCAGACTCATCCCCTCAGT        | qPCR        |
| IgD           | IgDF        | CAGGAGGAAAGTTCGGCATCA        | qPCR        |
|               | IgDR        | CCTCAAGGAGCTCTGGTTTGGA       | qPCR        |
| IgT           | IgTF        | CAGACAACAGCACCTCACCTA        | qPCR        |
|               | IgTR        | GAGTCAATAAGAAGACACAACGA      | qPCR        |
| IgM           | IgMF        | AAGAAAGCCTACAAGAGGGAGA       | qPCR        |
|               | IgMR        | CGTCAACAAGCCAAGCCACTA        | qPCR        |
| TCR $\alpha$  | TCRaF       | CAGCTTGAAGTCAAGAAATAC        | qPCR        |
|               | TCRaR       | TATCAGCACGTTGAAAACGAT        | qPCR        |
| TCR $\beta$   | TCRbF       | CTCCGCTAAGGAGTGTGAAGATAG     | qPCR        |
|               | TCRbR       | CAGGCCATAGAAGGTACTCTTAGC     | qPCR        |
| pIgR          | pIgRF       | GTACAGCAGGTGTTACAGTAAC       | qPCR        |
|               | pIgRR       | CCACAGACAGACCTTGATAAC        | qPCR        |
| Hepcidin      | HepF        | GCTGTTCCTTTCTCCGAGGTGC       | qPCR        |
|               | HepR        | GTGACAGCAGTTGCAGCACCA        | qPCR        |
| Claudin 4     | Cla4F       | GCTGGACTGGAGATCCTTGG         | qPCR        |
|               | Cla4R       | CCACACAAGACATCCAGAGCCC       | qPCR        |
| Complement c9 | Compl9F     | GGAAGTGCCTGTGTCTCTGTCTG      | qPCR        |
|               | Compl9R     | CCTGAGGAACACTCTCCACG         | qPCR        |
| IL17D         | IL17DF      | CCTGAGTGC GTTCCACCACAC       | qPCR        |
|               | IL17DR      | GTCGTGGGAGATCCTGTATGC        | qPCR        |
| SSA5          | SSA5F       | GCTCAAGGTGCTAAAGACATGTG      | qPCR        |
|               | SSA5R       | GAGTCTCATGTCTCGACC           | qPCR        |

|               |                      |                                                   |              |
|---------------|----------------------|---------------------------------------------------|--------------|
| Complement C3 | ComplC3F<br>ComplC3R | CCTCACAACAAGAGTGCACATC<br>CCAAGTGGGCAAACCTCATCTCC | qPCR<br>qPCR |
| PSMB9         | PSMB9F<br>PSMB9R     | CCTCAAGTTCGTTTCAGCTGC<br>GGTACTCTGCATCAACAAACC    | qPCR<br>qPCR |
| Heat shock 90 | HS90F<br>HS90R       | CCACCCTATTGTTGAGACTCTG<br>CCTGTAGATGCGATTGCGTGG   | qPCR<br>qPCR |
| DLA class I   | DLAF<br>DLAR         | CCTGCATTGAGTGGCTGAAG<br>CTGCCAGAACACCATGACTCC     | qPCR<br>qPCR |
| IL1 $\beta$   | IL1bF<br>IL1bR       | ACATTGCCAACCTCATCATCG<br>TTGAGCAGGTCCTTGTCCTTG    | qPCR<br>qPCR |
| IHNV          | IHNVgF<br>IHNVgR     | CGCTATGCACAAAGGCTCCAT<br>ATTTTCGTGAAGCTGGTAGCGC   | qPCR<br>qPCR |
| EF-1a         | EF-1aF<br>EF-1aR     | CAACGATATCCGTCGTGGCA<br>ACAGCGAAACGACCAAGAGG      | qPCR<br>qPCR |

Supplementary Table 2: List of selected mRNAs, grouped according to functional classes (shown in bold), found to be up- and down-regulated by nasal vaccination with IHNV (4 dpi) in the trout olfactory organ. The selection was based on manual assignment of function and genes with greatest fold differences in expression are presented, the genes that are down-regulated are denoted by (-) value. In this table the genes within each group are ordered by mean fold-change expression level following infection. The genes shown were significant at  $p < 0.05$  following unpaired t-test ( $p < 0.05$ ) with Benjamini-Hochberg False Discovery Rate (FDR) correction and greater than 2-fold change. <sup>1</sup>Indicates the unique code for the feature on the microarray, <sup>2</sup>Accession number of the cDNA sequence. <sup>3</sup>Mean of fold-change ( $\pm$ SEM) for genes increased/decreased in expression following IHNV infection. <sup>4</sup>Identity of the probe target as determined by BLASTX and BLASTN searches.

| Probe name <sup>1</sup> | ACC <sup>2</sup> | FC $\pm$ SEM <sup>3</sup> | Identity <sup>4</sup>                  |
|-------------------------|------------------|---------------------------|----------------------------------------|
| <b>NALT</b>             |                  |                           |                                        |
| TC162079                | BT125321         | 50 $\pm$ 1.2              | C-C motif chemokine 19                 |
| TC167667                | BT045725         | 2.9 $\pm$ 1.4             | L-selectin                             |
| TC157883                | BT072605         | 2.6 $\pm$ 1.1             | Vascular cell adhesion protein 1       |
| TC150169                | AM713180         | 6.1 $\pm$ 1.2             | Integrin alpha-M                       |
| TC171435                | NM_001173753     | -4.1 $\pm$ 1.0            | Carbohydrate sulfotransferase 1        |
| IMM58                   | P22362           | -2.1 $\pm$ 1.1            | C-C motif chemokine 28                 |
| <b>Innate immunity</b>  |                  |                           |                                        |
| TC152594                | XM_678994        | 73.2 $\pm$ 1.5            | Interferon-induced very large GTPase 1 |
| IMM1052                 | NM_001124355     | 22.5 $\pm$ 1.2            | Interleukin-1 receptor                 |
| IMM406                  | NM_001171871     | 16.2 $\pm$ 1.3            | Tumor necrosis factor receptor         |
| TC169834                | NM_001146166     | 16.1 $\pm$ 1.4            | Suppressor of cytokine signaling 1     |
| IMM486                  | NM_001124480     | 15.2 $\pm$ 1.1            | Cathelicidin 1                         |
| TC155613                | AY160981         | 11.8 $\pm$ 1.2            | Interleukin-8                          |
| TC132324                | NM_001124412     | 11.2 $\pm$ 1.0            | Toll-like receptor 13                  |
| IMM831                  | AF281354         | 10.3 $\pm$ 1.1            | Hepcidin                               |
| IMM592                  | NM_001124578     | 9.1 $\pm$ 1.2             | Toll-like receptor 3                   |
| TC138478                | NM_001165216     | 8.7 $\pm$ 1.4             | Proteasome subunit beta type-8         |
| IMM1040                 | BT047745         | 7.9 $\pm$ 1.1             | Interleukin-10 receptor subunit beta   |
| TC132590                | NM_001124258     | 7.6 $\pm$ 1.2             | Proteasome subunit beta type-9         |
| TC155771                | NM_001139852     | 6.8 $\pm$ 1.0             | Interferon regulatory factor 6         |
| TC155762                | EF165029         | 6 $\pm$ 1.4               | Interleukin-10                         |

|                          |              |           |                                                      |
|--------------------------|--------------|-----------|------------------------------------------------------|
| IMM313                   | NM_001124421 | 5.3±1.2   | MyD88                                                |
| CUST_135_PI420312184     | NM_001160506 | 5.2±1.3   | TRIM25                                               |
| TC159551                 | NM_001173710 | 4.2±1.0   | Interleukin-6 receptor subunit alpha                 |
| TC171674                 | BT026755     | 4.1±1.4   | Interferon regulatory factor 8                       |
| TC155105                 | Q5M7X9       | 3.4±1.2   | Mitochondrial ubiquitin ligase activator of nfkb 1-A |
| TC132478                 | NM_001124392 | 3±1.1     | Interleukin-12 subunit beta                          |
| IMM459                   | NM_001124623 | 2.7±1.0   | Interleukin-7 receptor subunit alpha                 |
| IMM417                   | NM_001140256 | 2.2±1.1   | TGF-beta receptor type-2                             |
| CUST_118_PI420312184     | NM_001124438 | 2.1±1.0   | Interferon regulatory factor 2                       |
| TC150027                 | NM_001124581 | -4.6±1.3  | Macrophage migration inhibitory factor               |
| TC137604                 | NM_001124399 | -2.18±1.2 | Interleukin-17D                                      |
| IMM589                   | NM_001146167 | -2±1.0    | Suppressor of cytokine signaling 2                   |
| <b>Acute response</b>    |              |           |                                                      |
| TC165091                 | NM_001124436 | 29.3±1.2  | Serum amyloid A                                      |
| TC169258                 | NM_001146565 | 19.7±1.4  | Serum amyloid A-5                                    |
| TC134895                 | O19063       | 6.3±1.0   | Serum amyloid P-component                            |
| <b>Adaptive immunity</b> |              |           |                                                      |
| IMM992                   | AY263797     | 23.2±1.5  | CD83                                                 |
| TC157426                 | BT058951     | 17±1.3    | High affinity immunoglobulin gamma Fc receptor I     |
| TC147178                 | BT072250     | 10.7±1.1  | B-cell receptor CD22                                 |
| TC159660                 | BT047230     | 9.8±1.2   | Regulator of G-protein signaling 1                   |
| TC132567                 | FR688119     | 9±1.0     | Class I histocompatibility antigen F10               |
| TC162887                 | BT074080     | 7.4±1.2   | Beta-2-microglobulin                                 |
| TC132611                 | AY523659     | 7.3±1.1   | BOLA class I histocompatibility antigen              |
| TC145984                 | DQ831751     | 7±1.2     | Ig heavy chain Mem5                                  |
| TC139133                 | BT046889     | 7±1.0     | High affinity immunoglobulin epsilon receptor        |
| TC155919                 | FJ940682     | 5.9±1.3   | Polymeric immunoglobulin receptor                    |
| TC144208                 | BT060117     | 5.7±1.4   | Low affinity immunoglobulin gamma                    |
| TC144852                 | AF273017     | 5.4±1.2   | Ig kappa chain V                                     |
| TC132398                 | NM_001124500 | 4.3±1.0   | Cytotoxic and regulatory T-cell molecule             |
| TC135926                 | Q8WML4       | 3.4±1.3   | Mucin-1                                              |
| TC170503                 | BT072728     | 2.9±1.2   | B-cell lymphoma 3 protein                            |
| TC152757                 | Q9Y6R7       | 2.8±1.3   | IgGFc-binding protein                                |
| TC162586                 | P98089       | 2.8±1.0   | Intestinal mucin-like protein                        |
| IMM398                   | NM_001165113 | 2.2±1.1   | T-cell surface glycoprotein CD3 zeta                 |
| IMM249                   | X65261       | 2.1±1.0   | Ig mu                                                |
| TC163654                 | EF467298     | -3.8±1.2  | T-cell receptor alpha                                |
| <b>Viral induced</b>     |              |           |                                                      |
| IMM536                   | NM_001124332 | 52.6±1.3  | VHSV-induced protein-3                               |
| IMM538                   | NM_001124334 | 52.4±1.3  | VHSV-induced protein-5                               |
| CUST_22_PI420312184      | NM_001129984 | 22±1.2    | VHSV-induced protein-8                               |
| IMM1057                  | NM_001124285 | 21.8±1.0  | VIG-2                                                |
| CUST_20_PI420312184      | NM_001124333 | 18.2±1.1  | VHSV-induced protein-4                               |
| CUST_15_PI420312184      | AF483535     | 9.4±1.2   | VHSV-induced C-lectin                                |
| <b>Oxidative stress</b>  |              |           |                                                      |

|          |              |          |                                    |
|----------|--------------|----------|------------------------------------|
| TC143962 | BT059657     | 5.5±1.3  | Heat shock 60                      |
| TC144473 | BT059713     | 5.1±1.4  | DnaJ homolog subfamily A member 2  |
| TC171997 | NM_200044    | 5±1.3    | DnaJ homolog subfamily C member 21 |
| TC137463 | XM_002716458 | 4.7±1.4  | DnaJ homolog subfamily B member 11 |
| TC160594 | Q58DL1       | 4.6±1.2  | Arginase-2 mitochondrial           |
| TC161098 | BT072794     | 4.2±1.0  | Glutathione peroxidase 3           |
| TC161884 | BC065970     | 3.3±1.1  | Heat shock 70                      |
| IMM220   | NM_001124231 | 2.9±1.3  | Heat shock 90 beta                 |
| TC146008 | U19370       | 2.2±1.2  | Heat shock 30                      |
| TC159384 | BT045539     | 2.1±1.0  | Glutathione reductase              |
| TC145126 | U89945       | -6.9±1.4 | Heat shock alpha                   |
| TC151247 | CR700599     | -3.4±1.2 | Glutathione peroxidase 2           |

### Chemokines

|          |              |          |                             |
|----------|--------------|----------|-----------------------------|
| TC162079 | BT125321     | 50±1.5   | CCL19                       |
| IMM926   | AJ417078     | 43.4±1.2 | CXCL10-like                 |
| IMM1005  | NM_001124489 | 31.2±1.3 | CCL4                        |
| TC132837 | NM_001124316 | 22.2±1.2 | Virus-induced CXC chemokine |
| IMM111   | NM_001124406 | 13.6±1.3 | CXCR1                       |
| TC132449 | AF260960     | 6.9±1.0  | IL-8R                       |
| TC141029 | NM_001160689 | 4.6±1.2  | CCL13                       |
| TC154962 | NM_001089524 | 3±1.1    | CCR4                        |
| TC143794 | NM_001124625 | 3±1.2    | CXCR3                       |
| TC148292 | NM_001140855 | -5.7±1.3 | CXC9                        |
| TC143681 | BT056553     | -2.9±1.1 | CXC14                       |

### Complement

|          |              |          |                     |
|----------|--------------|----------|---------------------|
| TC148206 | Q9ES30       | 17.3±1.2 | Complement C1q      |
| TC171606 | L24433       | 10.7±1.3 | Complement C3       |
| TC132318 | NM_001124385 | 7.1±1.4  | Complement C4       |
| IMM964   | NM_001124408 | 4.8±1.0  | Complement C8 gamma |
| IMM963   | NM_001124621 | 4.5±1.1  | Complement C6       |
| TC136854 | NM_001124426 | -3.5±1.2 | Complement C9       |

### Energy related

|          |              |          |                                            |
|----------|--------------|----------|--------------------------------------------|
| TC154720 | NM_053962    | 66.5±1.3 | L-serine dehydratase/L-threonine deaminase |
| TC170517 | BT059114     | 30.9±1.1 | Glyceraldehyde 3-phosphate dehydrogenase   |
| TC161187 | BT043786     | 4.6±1.2  | Fructose-bisphosphate aldolase A           |
| TC143586 | NM_001141724 | 3.2±1.0  | Glucose-6-phosphate 1-dehydrogenase        |

### Protein metabolism

|          |              |          |                                    |
|----------|--------------|----------|------------------------------------|
| TC138833 | BT049918     | 44.3±1.2 | Polyubiquitin-C                    |
| TC150657 | NM_001173966 | 20.7±1.1 | NEDD8-conjugating enzyme           |
| TC138749 | Q5GLZ8       | 14.2±1.4 | E3 ubiquitin-protein ligase HERC4  |
| TC152463 | NM_001124304 | 9.5±1.1  | Cathepsin B                        |
| TC134251 | BT075243     | 9.15±1.5 | Ribosomal RNA processing protein 1 |
| TC132725 | NM_001124491 | 8±1.2    | Calpain-2 catalytic subunit        |
| TC144585 | BT082794     | 6.5±1.0  | Cathepsin L                        |



|          |              |           |                            |
|----------|--------------|-----------|----------------------------|
| TC134551 | NM_001141697 | 6.3±1.3   | 60S ribosomal protein L6   |
| TC135968 | BT071960     | 4.7±1.1   | 28S ribosomal protein S2   |
| TC133997 | BT074236     | 3.8±1.0   | Proteasome subunit alpha   |
| IMM615   | BT043515     | 3.4±1.2   | Cathepsin D                |
| TC164056 | BT059055     | 2.9±1.3   | Caspase-9                  |
| TC146850 | FR751081     | 2.7±1.0   | Caspase-3                  |
| TC149669 | BT047994     | -11.9±1.4 | 40S ribosomal protein S3   |
| TC172176 | AJ312339     | -3.5 ±1.2 | 60S ribosomal protein L27a |
| TC142208 | NM_001140206 | -2.4±1.0  | Cathepsin F                |

**Lipid metabolism**

|          |              |          |                                           |
|----------|--------------|----------|-------------------------------------------|
| TC135848 | BT072598     | 12.8±1.4 | Perilipin-2                               |
| TC141932 | XM_001381263 | 9.6±1.2  | Lipid phosphate phosphohydrolase 3        |
| TC147397 | Q8K4F2       | 7.5±1.1  | Arachidonate 15-lipoxygenase B            |
| TC159982 | XM_001512920 | 4.4±1.3  | Glycerol-3-phosphate acyltransferase 3    |
| TC135251 | NM_001173770 | 2.8±1.0  | Lipase member H                           |
| TC169585 | XM_001089527 | 2.6±1.2  | Elongation of very long chain fatty acids |
| TC159562 | NM_001141203 | -19±1.4  | Fatty acid-binding protein adipocyte      |
| TC167389 | XM_002663239 | -4.9±1.2 | Long-chain-fatty-acid                     |
| TC147270 | BT048822     | -3.5±1.0 | Apolipoprotein A                          |

**Cell cycle**

|          |              |          |                                        |
|----------|--------------|----------|----------------------------------------|
| TC153816 | NM_200653    | 11.5±1.2 | Transcriptional regulator ATRX         |
| TC144283 | NM_001126433 | 11.4±1.3 | M-phase phosphoprotein 8               |
| TC170735 | FQ231962     | 10.5±1.1 | RNA polymerase-associated protein RTF1 |
| TC141671 | BT056522     | 7.2±1.0  | Transcription initiation factor TFIID  |
| IMM988   | NM_001124447 | 6±1.3    | CCAAT/enhancer-binding protein beta    |
| TC159950 | NM_001173931 | 4±1.4    | Cell division cycle 5-like             |
| TC154625 | XM_536753    | 2.8±1.0  | DNA replication factor Cdt1            |

**Cell proliferation/apoptosis**

|                     |              |          |                                             |
|---------------------|--------------|----------|---------------------------------------------|
| TC155993            | NM_001141351 | 21.2±1.2 | Programmed cell death 1 ligand 1            |
| TC151400            | NM_001114446 | 5.4±1.0  | Transforming growth factor beta regulator 1 |
| IMM46               | O15519       | 5±1.1    | CASP8 and FADD-like apoptosis regulator     |
| TC142441            | NM_001140256 | 4.7±1.0  | TGF-beta receptor type-2                    |
| TC168626            | BT072249     | 4.1±1.3  | Growth arrest-specific protein 6            |
| TC137408            | NM_001173565 | 3.4±1.2  | Cell cycle progression protein 1            |
| TC141106            | NM_001140346 | 2.7±1.2  | Apoptosis inhibitor 5-B                     |
| CUST_32_PI420312184 | BT072239     | 2.5±1.0  | Bcl-2-like                                  |
| TC146370            | BT059075     | 2.8±1.1  | Retinoic acid receptor responder protein 3  |
| TC134353            | BT046832     | -6.9±1.2 | TP53-regulated inhibitor of apoptosis 1     |
| TC171862            | NM_001141656 | -4.4±1.2 | CIDE-B                                      |

**Permeability**

|          |              |          |                  |
|----------|--------------|----------|------------------|
| TC132896 | BT060383     | 17.9±1.3 | Collagenase 3    |
| TC141152 | BT072217     | 12.1±1.0 | Fibronectin      |
| TC138422 | NM_001165403 | 8.7±1.2  | Claudin D        |
| TC167201 | XM_003225626 | 7±1.1    | Protocadherin-7  |
| TC150169 | AM713180     | 6.1±1.3  | Integrin alpha-M |

|                           |              |           |                                                   |
|---------------------------|--------------|-----------|---------------------------------------------------|
| TC147436                  | P23229       | 5.2±1.0   | Integrin alpha-6                                  |
| TC151231                  | Q9UGQ3       | 4.2±1.0   | Solute carrier family 2                           |
| TC132918                  | NM_001124435 | 3.7±1.3   | Integrin beta-2                                   |
| TC138660                  | HQ206591     | 3.6±1.1   | Organic solute transporter subunit alpha          |
| TC135491                  | Q6L708       | 3.5±1.3   | Claudin-1                                         |
| TC172265                  | BT058818     | 3.4±1.1   | Integrin beta-1                                   |
| TC171123                  | XM_002688579 | 3±1.0     | Solute carrier family 35                          |
| TC144562                  | Q5EBI0       | 2.7±1.2   | Solute carrier family 26                          |
| TC146276                  | Q9YH92       | 2.4±1.3   | Claudin-7                                         |
| TC152062                  | CR711779     | 2.4±1.1   | Tight junction protein ZO-2                       |
| TC168612                  | Q9EPR4       | -7.4±1.1  | Solute carrier family 23                          |
| TC138901                  | O14493       | -5.1±1.0  | Claudin-4                                         |
| TC148044                  | P56746       | -4.8±1.3  | Claudin-15                                        |
| <b>Neuronal system</b>    |              |           |                                                   |
| TC144610                  | NM_001141101 | -153±1.4  | Somatostatin-1A                                   |
| TC150931                  | L37836       | -98.3±1.2 | Glutamate receptor subunit 2B                     |
| TC157273                  | BT125271     | -34.2±1.2 | Glucagon family neuropeptides                     |
| TC148591                  | FJ973564     | -21.9±1.3 | Neuropeptide Y                                    |
| TC146280                  | BT043925     | -21.7±1.2 | Parvalbumin beta 2                                |
| TC159186                  | DQ641434     | -17.7±1.0 | Neurexin-3-beta                                   |
| TC140897                  | NM_001140648 | -8.6±1.3  | Neuroendocrine protein 7B2                        |
| TC168111                  | GU108576     | -5±1.1    | Brain-derived neurotrophic factor                 |
| TC152088                  | BT072067     | -2.2±1.0  | Neural cell adhesion molecule L1-                 |
| TC132692                  | BT073379     | -2.1±1.3  | Calmodulin                                        |
| TC158828                  | CR637442     | -2±1.2    | Selenoprotein M                                   |
| <b>Vessel</b>             |              |           |                                                   |
| TC154308                  | NM_001032683 | 59.2±1.4  | Guanylate cyclase soluble subunit alpha-1         |
| TC157886                  | AJ717301     | 6±1.2     | Vascular endothelial growth factor A              |
| TC134243                  | BT072605     | 4.3±1.0   | Vascular cell adhesion protein 1                  |
| TC160858                  | Q2TA49       | 2.2±1.2   | Vasodilator-stimulated phosphoprotein             |
| TC160119                  | GU817337     | 2.1±1.0   | Vascular endothelial growth factor receptor       |
| <b>Platelet</b>           |              |           |                                                   |
| CUST_2_PI420312184        | NM_001124316 | 28.2±1.5  | Platelet basic protein                            |
| IMM610                    | BT057627     | 4.4±1.0   | CD63 antigen                                      |
| TC142442                  | BT072759     | 2.3±1.1   | Platelet-derived growth factor receptor           |
| TC141971                  | XM_002710305 | 2.3±1.0   | Beta-type platelet-derived growth factor receptor |
| <b>Metalloproteinases</b> |              |           |                                                   |
| IMM302                    | NM_001124370 | 14.6±1.5  | Matrix metalloproteinase-9                        |
| IMM301                    | BT072316     | 5.2±1.2   | Matrix metalloproteinase-23                       |
| TC148182                  | BT060428     | 5±1.0     | Metalloproteinase inhibitor 2                     |
| IMM306                    | Q95220       | 4.6±1.0   | Matrix metalloproteinase-14                       |
| <b>Globin</b>             |              |           |                                                   |
| TC150624                  | NM_001160555 | 7.2±1.4   | Hemoglobin subunit beta-1                         |
| TC164941                  | AF281329     | 7±1.2     | Haptoglobin 1                                     |

|                  |              |         |                                            |
|------------------|--------------|---------|--------------------------------------------|
| TC161955         | BT059981     | 6.8±1.0 | Hemoglobin subunit alpha-4                 |
| TC162076         | NM_001124388 | 2.6±1.1 | Neuroglobin-2                              |
| <b>Olfactory</b> |              |         |                                            |
| TC168421         | BT072283     | 9±1.5   | Olfactomedin-4                             |
| TC142095         | BT059075     | 4.4±1.2 | Retinoic acid receptor responder protein 3 |
| TC132610         | NM_001124239 | 3.7±1.0 | Olfactory receptor 2AT4                    |
| TC154582         | BT057899     | 3.6±1.1 | Olfactory receptor 1E3                     |
| TC156356         | HM133622     | 3.1±1.0 | Olfactory receptor family C                |

Supplementary Table 3: List of selected mRNAs, grouped according to functional classes (shown in bold), found to be up- and down-regulated 14 dpi nasal vaccination with live attenuated IHNV in the trout olfactory organ. The selection was based on manual assignment of function and genes with greatest fold differences in expression are presented, the genes that are down-regulated are denoted by (-) value. In this table the genes within each group are ordered by mean fold-change expression level following infection. The genes shown were significant at  $p < 0.05$  following unpaired t-test ( $p < 0.05$ ) with Benjamini-Hochberg False Discovery Rate (FDR) correction and greater than 2-fold change. <sup>1</sup>Indicates the unique code for the feature on the microarray, <sup>2</sup>Accession number of the cDNA sequence. <sup>3</sup>Mean of fold-change ( $\pm$ SEM) for genes increased/decreased in expression following IHNV infection. <sup>4</sup>Identity of the probe target as determined by BLASTX and BLASTN searches.

| Probe name <sup>1</sup>  | ACC <sup>2</sup> | FC $\pm$ SEM <sup>3</sup> | Identity <sup>4</sup>                        |
|--------------------------|------------------|---------------------------|----------------------------------------------|
| <b>Innate immunity</b>   |                  |                           |                                              |
| TC151419                 | BT072737         | 2.6.2 $\pm$ 1.0           | Inhibitor of nuclear factor kappa-B kinase   |
| <b>Acute response</b>    |                  |                           |                                              |
| TC169258                 | NM_001146565     | 6.3 $\pm$ 1.4             | Serum amyloid A-5                            |
| IMM1088                  | NM_001124436     | 5.3 $\pm$ 1.1             | Serum amyloid A-3                            |
| <b>Adaptive immunity</b> |                  |                           |                                              |
| TC152757                 | Q9Y6R7           | 8.7 $\pm$ 1.5             | IgGFc-binding protein                        |
| TC132403                 | AY870263         | 6.4 $\pm$ 1.3             | Ig mu chain                                  |
| TC166854                 | U69990           | 3.5 $\pm$ 1.2             | Ig kappa chain V-I                           |
| TC145661                 | DQ831794         | 3.5 $\pm$ 1.0             | Ig heavy chain Mem5                          |
| TC147427                 | BT047697         | 2.7 $\pm$ 1.0             | Ig kappa chain V-III                         |
| TC164241                 | GQ217535         | 2.6 $\pm$ 1.2             | Immunoglobulin lambda-like                   |
| TC132611                 | AY523659         | 7.3 $\pm$ 1.4             | BOLA class I histocompatibility antigen      |
| TC145984                 | DQ831751         | 7 $\pm$ 1.2               | Ig heavy chain Mem5                          |
| TC165339                 | BT060181         | 2.3 $\pm$ 1.3             | Ig kappa-b4                                  |
| TC142338                 | AF115528         | -366 $\pm$ 1.4            | Major histocompatibility complex class I     |
| TC132537                 | AF287486         | -264.6 $\pm$ 1.5          | Class I histocompatibility antigen F10       |
| TC144852                 | AF273017         | -43.3 $\pm$ 1.2           | Proteasome subunit beta type-8               |
| TC169094                 | AF296373         | -23.5 $\pm$ 1.2           | DLA class I histocompatibility antigen A9/A9 |
| TC132590                 | NM_001124258     | -15.1 $\pm$ 1.3           | Proteasome subunit beta type-9               |
| TC164135                 | XM_001920312     | -2.9 $\pm$ 1.2            | Vascular cell adhesion protein 1             |
| <b>Viral induced</b>     |                  |                           |                                              |

|                           |              |          |                                          |
|---------------------------|--------------|----------|------------------------------------------|
| IMM857                    | NM_001124332 | 9.5±1.2  | VHSV-induced protein-3                   |
| CUST_19_PI420312184       | NM_001124334 | 5.4±1.1  | VHSV-induced protein-5                   |
| CUST_20_PI420312184       | NM_001124333 | 4.6±1.0  | VHSV-induced protein-4                   |
| CUST_23_PI420312184       | NM_001124316 | 4.6±1.3  | VHSV-induced protein-7                   |
| CUST_25_PI420312184       | NM_001124253 | 4.5±1.1  | VIG-1                                    |
| <b>Oxidative stresses</b> |              |          |                                          |
| TC153634                  | NM_001141459 | 3.6±1.3  | Microsomal glutathione S-transferase 2   |
| TC172388                  | NM_001124329 | 2.6±1.1  | Superoxide dismutase                     |
| TC148355                  | BT057727     | 2.4±1.3  | Glutathione peroxidase 7                 |
| TC142591                  | BT043748     | -7.4±1.5 | Heat shock protein beta-11               |
| TC153065                  | NM_001141684 | -3.5±1.0 | Heat shock 71                            |
| TC147502                  | NM_001124748 | -2.8±1.3 | Heat shock factor 1                      |
| TC145126                  | U89945       | -2.7±1.3 | Heat shock 90                            |
| TC146008                  | U19370       | -2.7±1.3 | Heat shock 30                            |
| TC145802                  | BT072794     | -2.5±1.2 | Glutathione peroxidase 3                 |
| <b>Chemokines</b>         |              |          |                                          |
| TC148292                  | NM_001140855 | 6.5±1.2  | CXC9                                     |
| <b>Complement</b>         |              |          |                                          |
| TC132318                  | NM_001124385 | 14.4±1.3 | Complement C4                            |
| TC171606                  | L24433       | 6.0±1.1  | Complement C3                            |
| TC146390                  | NM_001124265 | 2.7±1.0  | Complement C1q                           |
| TC142005                  | NM_001124427 | -2.3±1.1 | Complement factor H                      |
| <b>Energy related</b>     |              |          |                                          |
| TC152317                  | NM_001173694 | 4.2±1.3  | 6-phosphofructokinase                    |
| TC134937                  | BT049461     | 2.7±1.1  | Cytochrome c oxidase subunit 4           |
| TC161187                  | BT043786     | 2.4±1.0  | Glyceraldehyde 3-phosphate dehydrogenase |
| TC160550                  | BT047645     | 2.3±1.0  | Aldose reductase                         |
| TC168035                  | NM_001139709 | -3.1±1.3 | Fructose-bisphosphate aldolase A         |
| TC141795                  | NM_001141700 | -2.5±1.3 | Alpha-enolase                            |
| <b>Protein metabolism</b> |              |          |                                          |
| TC170835                  | BT060180     | 7.2±1.3  | 60S ribosomal protein L13a               |
| TC157043                  | BC155643     | 3.2±1.1  | NEDD8-conjugating enzyme                 |
| TC164515                  | BT048302     | 2.5±1.2  | 40S ribosomal protein S2                 |
| TC142167                  | NM_001146570 | 2.4±1.0  | Ubiquitin-conjugating enzyme E2          |
| TC156961                  | BT081306     | 2.2±1.2  | Cathepsin L1                             |
| TC151997                  | BT072762     | 2.1±1.0  | Cathepsin Z                              |
| TC140936                  | BT082794     | 2.0±1.0  | Cathepsin L                              |
| TC153220                  | BT047689     | -2.6±1.3 | 60S ribosomal protein L35                |
| TC163550                  | BT046841     | -2.4±1.2 | 26S proteasome complex subunit DSS1      |
| TC132725                  | NM_001124491 | -2.0±1.0 | Calpain-2                                |
| <b>Lipid metabolism</b>   |              |          |                                          |
| TC143031                  | CR684502     | 3.9±1.2  | Apolipoprotein D                         |

|          |              |          |                                           |
|----------|--------------|----------|-------------------------------------------|
| TC149244 | XM_001920851 | 3.5±1.0  | Adipocyte enhancer-binding protein 1      |
| TC156121 | BC164928     | 2.9±1.2  | Fatty acid-binding protein 10-A           |
| TC140097 | NM_213416    | 2.1±1.3  | Elongation of very long chain fatty acids |
| TC147139 | NM_019821    | -2.5±1.0 | Glycolipid transfer protein               |
| TC167544 | AF542091     | -2.2±1.1 | Low-density lipoprotein receptor          |
| TC164695 | FJ842648     | -2.0±1.0 | Fatty acid synthase                       |

### Cell cycle

|          |              |          |                                       |
|----------|--------------|----------|---------------------------------------|
| TC142979 | BT048797     | 4.6±1.2  | G2/mitotic-specific cyclin-B1         |
| TC143690 | BT072376     | 3.8±1.1  | DNA topoisomerase 2-alpha             |
| TC142811 | AM993097     | 3.6±1.1  | ATP-dependent DNA helicase PIF1       |
| TC141671 | BT056522     | 7.2±1.0  | Transcription initiation factor TFIID |
| TC134576 | NM_001139779 | 3.0±1.0  | Cell division cycle protein 20        |
| TC161901 | Q99741       | 2.0±1.1  | Cell division control protein 6       |
| TC141625 | NM_001142720 | -2.0±1.0 | RNA polymerase II subunit A           |
| TC155293 | BT072384     | -2.0±1.1 | Protein MCM10                         |

### Cell proliferation/apoptosis

|          |              |          |                                   |
|----------|--------------|----------|-----------------------------------|
| TC137332 | NM_001139999 | 7.2±1.3  | Connective tissue growth factor   |
| TC138015 | NM_001141717 | 5.3±1.2  | Serine protease HTRA1             |
| TC158874 | FJ966093     | 3.6±1.2  | Transforming growth factor beta-2 |
| TC157377 | Q6DC66       | 3.4±1.2  | Bcl-2                             |
| TC142408 | BX465208     | 3.3±1.0  | Transcription factor Sox-14       |
| TC169661 | Q08DY9       | 3.0±1.3  | Caspase-3                         |
| TC147580 | BT045040     | -2.8±1.1 | Annexin A13                       |
| TC141852 | BX936258     | -2.2±1.0 | TSC22 domain family protein 1     |
| IMM80    | BT028551     | -2.1±1.1 | CD81 antigen                      |

### Permeability

|          |              |          |                                          |
|----------|--------------|----------|------------------------------------------|
| TC148044 | P56746       | 3.5±1.2  | Claudin-15                               |
| TC134765 | BT047482     | 2.7±1.0  | Claudin-4                                |
| TC145295 | HQ206591     | 2.3±1.3  | Organic solute transporter subunit alpha |
| TC139896 | BT072200     | 2.1±1.0  | Solute carrier family 28                 |
| TC146632 | NM_001140144 | -3.2±1.3 | Solute carrier family 22                 |

### Neuronal system

|          |              |          |                                         |
|----------|--------------|----------|-----------------------------------------|
| TC142036 | XM_003201140 | 7.1±1.3  | 5-hydroxytryptamine receptor 3A         |
| TC153128 | BT079716     | 5.2±1.2  | Myelin and lymphocyte protein           |
| TC152753 | XM_002715416 | 3.0±1.1  | Synaptotagmin-10                        |
| TC148500 | P24727       | 2.2±1.3  | Neurotrophin-4                          |
| TC153445 | NM_001124694 | 13.3±1.1 | Ependymin-2                             |
| TC168099 | NM_001199365 | -4.4±1.0 | Semaphorin-6                            |
| TC140939 | BT059740     | -3.1±1.0 | Neuron-specific protein family member 1 |
| TC168111 | GU108576     | -2.6±1.1 | Brain-derived neurotrophic factor       |
| TC141604 | NM_001140648 | -2.3±1.2 | Neuroendocrine protein 7B2              |

### Vessel

|          |              |         |                         |
|----------|--------------|---------|-------------------------|
| TC165769 | NM_001140446 | 8.2±1.2 | Angiotensinogen         |
| TC139007 | Q95334       | 7.4±1.1 | Glutamyl aminopeptidase |

|                           |              |           |                                             |
|---------------------------|--------------|-----------|---------------------------------------------|
| TC163724                  | NM_001146509 | 7.0±1.0   | Cytokine-like protein 1                     |
| <b>Platelet</b>           |              |           |                                             |
| IMM855                    | NM_001124316 | 3.6±1.3   | Platelet basic protein                      |
| TC162473                  | BC165195     | 2.3±1.2   | Coagulation factor VII                      |
| TC156035                  | XM_695441    | 2.2±1.1   | Platelet endothelial aggregation receptor 1 |
| <b>Metalloproteinases</b> |              |           |                                             |
| IMM405                    | BT060428     | 7.9±1.3   | Metalloproteinase inhibitor 2               |
| TC134956                  | NM_001140457 | 6.9±1.2   | Matrix metalloproteinase-9                  |
| TC162423                  | BT060428     | 5±1.1     | Metalloproteinase inhibitor 3               |
| TC132896                  | BT060383     | -2.9±1.0  | Matrix metalloproteinase-1                  |
| <b>Globin</b>             |              |           |                                             |
| TC168272                  | NM_001124352 | 4.0±1.3   | Hemoglobin embryonic subunit alpha          |
| TC152493                  | NM_001124514 | 2.6±1.2   | Mannose-specific lectin                     |
| IMM753                    | AF279136     | 4.6±1.0   | Haptoglobin                                 |
| <b>Structural</b>         |              |           |                                             |
| TC138527                  | CU306817     | 24±1.2    | Collagen alpha-1                            |
| TC135539                  | NM_001124353 | 10±1.2    | Keratin type I cytoskeletal 13              |
| TC143643                  | BT071961     | 7.0±1.0   | Collagen alpha-2                            |
| TC133994                  | XM_002663369 | 5.2±1.1   | Collagen alpha-3                            |
| TC156862                  | NM_001124352 | 4.9±1.0   | Keratin type II cytoskeletal 8              |
| TC155895                  | AB481206     | 4.0±1.3   | Actin-3                                     |
| TC155607                  | Q8WWK9       | 3.8±1.2   | Cytoskeleton-associated protein 2           |
| TC160106                  | BT059156     | 3.1±1.3   | Tubulin alpha-4A                            |
| TC167682                  | AB076182     | 2.8±1.2   | Myosin heavy chain                          |
| TC144889                  | BT057006     | 4.9±1.0   | Tropomyosin alpha-4                         |
| TC165734                  | DQ680175     | -22.5±1.2 | Troponin T                                  |
| TC170243                  | BT047894     | -17.0±1.0 | Troponin C                                  |
| TC140573                  | XM_001923765 | -2.6±1.3  | Titin                                       |
| TC142753                  | BT057236     | -2.0±1.1  | Myozenin-2                                  |
| TC164617                  | NM_001140492 | -2.0±1.10 | Tubulin-folding cofactor B                  |

Supplementary Table 4: Statistical analysis of nasal vs i.m injection vaccination trials with the live attenuated IHNV vaccine in rainbow trout. Exact Parameter Estimates, odds ratios, and two-sided p-value for testing the parameter equal to zero.

| Parameter           | Levels           | Estimate | SE     | 95% CI  |        | p-Value | Odds Est | Odds CI |          |
|---------------------|------------------|----------|--------|---------|--------|---------|----------|---------|----------|
| Treatment           | control          | 4.1326   | 1.0251 | 2.3034  | 7.8588 | <.0001  | 62.338   | 10.008  | >999.999 |
| Treatment           | nasal            | 1.4109   | 1.1253 | -0.9253 | 5.3238 | 0.3687  | 4.1      | 0.396   | 205.156  |
| Challenge           | unchalle         | 0.6982   | 1.4196 | -3.6798 | 5.0762 | 1       | 2.01     | 0.025   | 160.168  |
| treatment*challenge | control unchalle | -3.8108  | 1.5751 | -8.563  | 0.9414 | 0.1239  | 0.022    | <0.001  | 2.564    |
| treatment*challenge | nasal unchalle   | -1.1819  | 1.6217 | -6.0296 | 3.6658 | 1       | 0.307    | 0.002   | 39.086   |

Supplementary Table 5: Exact Parameter Estimates, odds ratios, and two-sided p-value for testing the parameter equal to zero in the ERM vaccination trial where nasal vaccine delivery was compared to i.p injection vaccination.

| Parameter           | Levels           | Estimate | SE     | 95% CI  |        | p-Value | Odds Est | Odds CI |          |
|---------------------|------------------|----------|--------|---------|--------|---------|----------|---------|----------|
| Treatment           | control          | 4.1326   | 1.0251 | 2.3034  | 7.8588 | <.0001  | 62.338   | 10.008  | >999.999 |
| Treatment           | nasal            | 1.4109   | 1.1253 | -0.9253 | 5.3238 | 0.3687  | 4.1      | 0.396   | 205.156  |
| Challenge           | unchalle         | 0.6982   | 1.4196 | -3.6798 | 5.0762 | 1       | 2.01     | 0.025   | 160.168  |
| treatment*challenge | control unchalle | -3.8108  | 1.5751 | -8.563  | 0.9414 | 0.1239  | 0.022    | <0.001  | 2.564    |
| treatment*challenge | nasal unchalle   | -1.1819  | 1.6217 | -6.0296 | 3.6658 | 1       | 0.307    | 0.002   | 39.086   |
